# Supplementary material
Source: Springer Nature journal article supplement (https://www.springermedizin.de/resource/supplementary/12888_2011_943_MOESM2_ESM.pdf/9478960)

**Figure 3. Mean EQ-5D utility score of non-hospitalized and hospitalized patients with and without symptoms indicative of post-traumatic stress disorder (PTSS) at 2½, 5, 12 and 24 month follow-up**

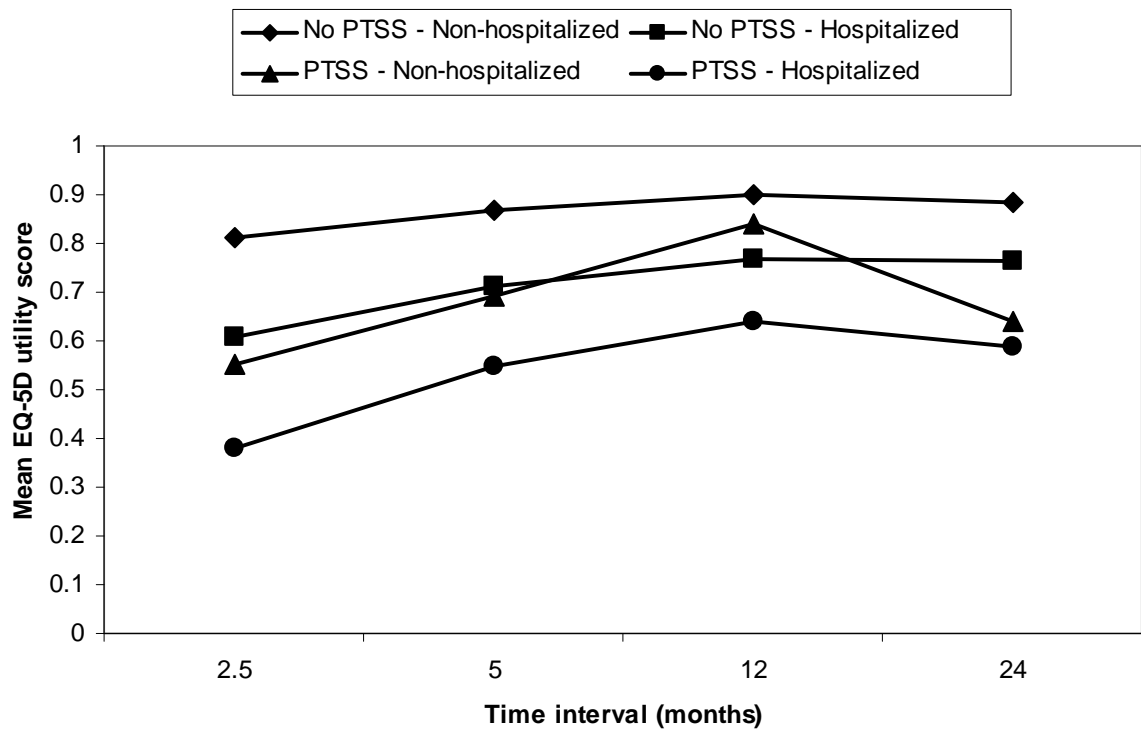

Supplement: MOESM2 [file 9478960]
